# Supplementary material for: Lonafarnib and everolimus reduce pathology in iPSC-derived tissue engineered blood vessel model of Hutchinson-Gilford Progeria Syndrome
Source: PubMed Central journal article supplement (PMC10050176; doi:10.1038/s41598-023-32035-3), 2023-03-28
Supplement: 41598_2023_32035_MOESM1_ESM.pdf [file 41598_2023_32035_MOESM1_ESM.pdf]

**Supplementary Information for  
Lonafarnib and Everolimus reduce pathology in iPSC-derived tissue engineered  
blood vessel model of Hutchinson-Gilford Progeria Syndrome**

Nadia O. Abutaleb, Leigh Atchison, Leandro Choi, Akhil Bedapudi, Kevin Shores,  
Yantnew Gete, Kan Cao, George A. Truskey

Corresponding author George A. Truskey  
Email: [gtruskey@duke.edu](mailto:gtruskey@duke.edu)

**This file includes:**

Figs. S1 to S14  
Tables S1 to S4

**Figure S1. Cell viability with Lonafarnib and Everolimus treatment.**

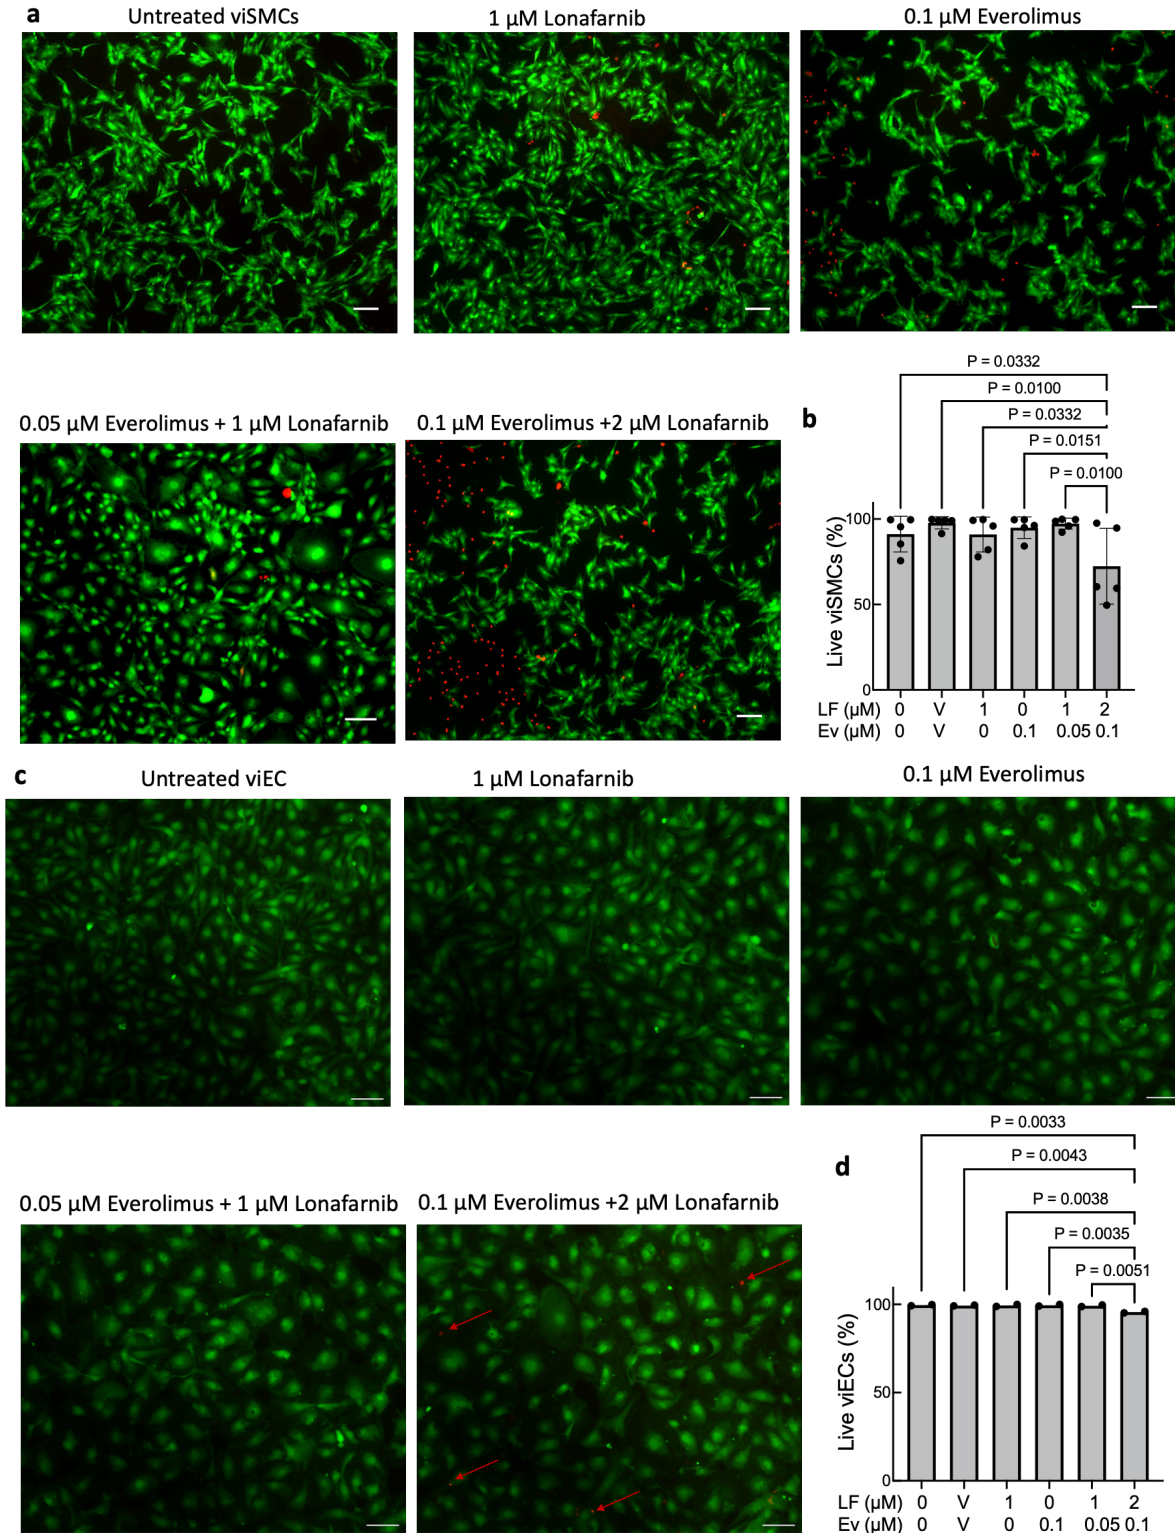

Representative images (**a**, **c**) and quantification (**b**, **d**) of calcein-AM/EthD-1 staining on HGPS 167 CL2 viSMCs (**a**, **b**) and viECs (**c**, **d**) treated with Lonafarnib (LF) and Everolimus (Ev). 'V' indicates DMSO vehicle control. Scale bar 200  $\mu$ m in **a** and 100  $\mu$ m in **c**. Arrows in **c** denote EthD-1 to identify dead cells. Mean  $\pm$  SD, N = 5 per group for viSMCs and N=2 for viECs. Data analyzed by ANOVA followed by post hoc Tukey test.

**Figure S2. Entire Western Blots of Progerin Levels for Different Everolimus Concentrations**

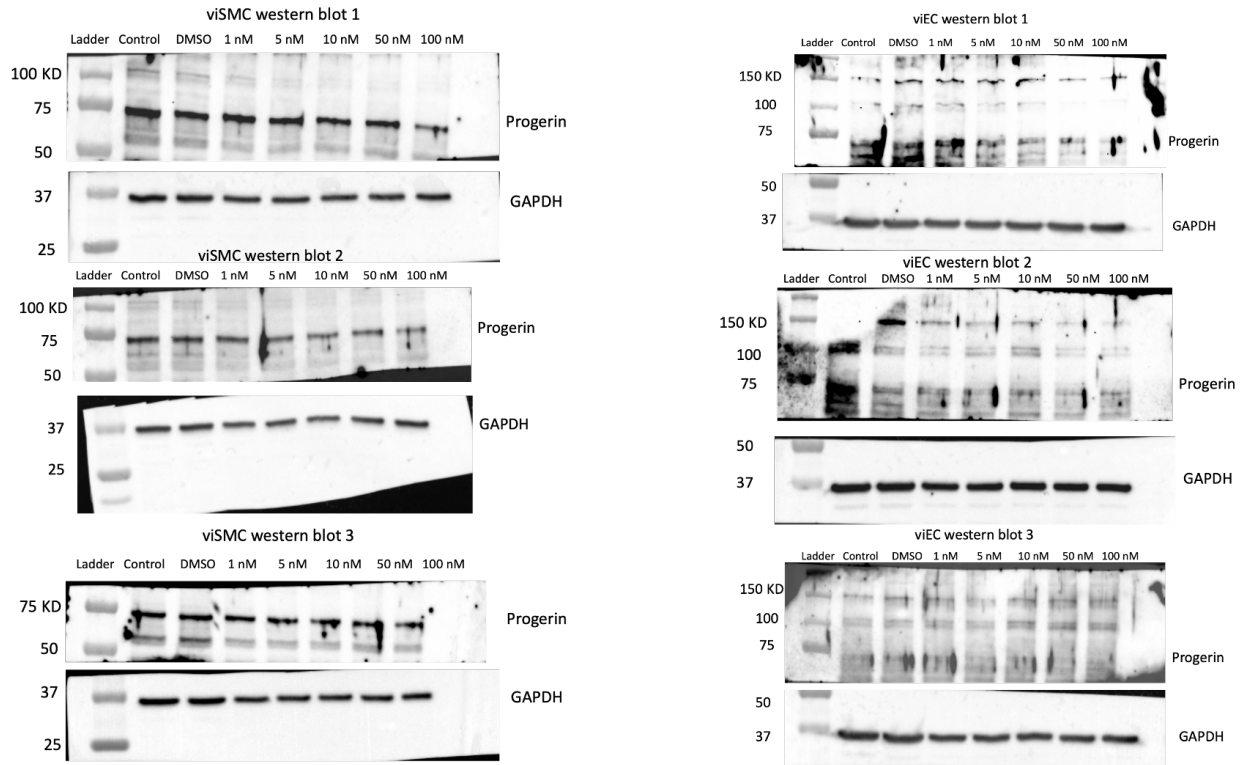

Images of the entire western blots for quantification of progerin levels in Figure 1. Each blot was cut and regions noted separately stained for GAPDH and progerin.

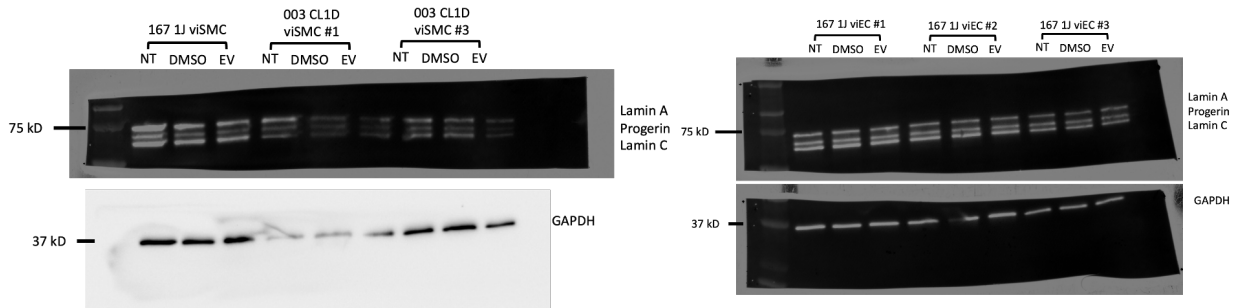

Images of the Western blots for quantification of protein levels in Figure S3. Each blot was cut and regions noted separately stained for GAPDH, progerin, lamin A, and lamin C.

**Figure S3. Effect of Everolimus on levels of progerin, lamin A and lamin C in HGPS viECs and viSMCs.**

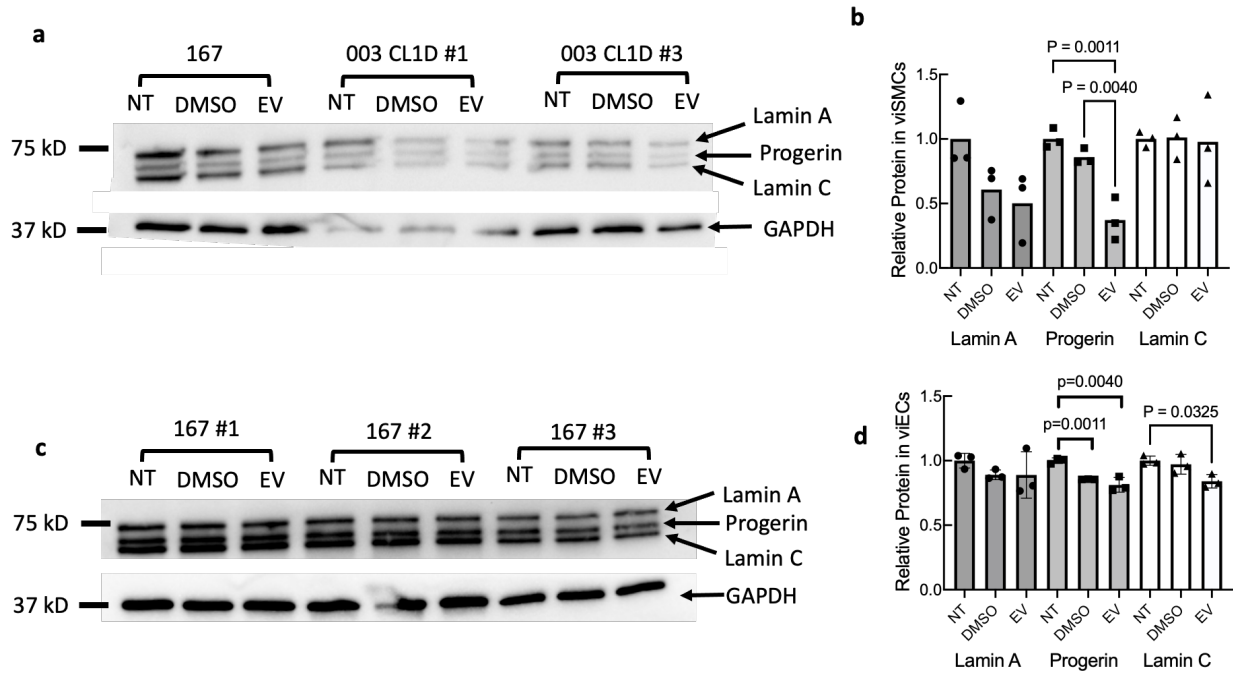

The viSMCs and viECs were incubated for 7 days in media containing 0.1  $\mu$ M Everolimus as in Figure 1. Western blot was performed using an antibody to lamin A/C for viSMC (a) and viECs (b) which were quantified by densitometry (b, d). Data analyzed by ANOVA followed by post hoc Tukey text.



## Figure S4. Misshapen HGPS nuclei

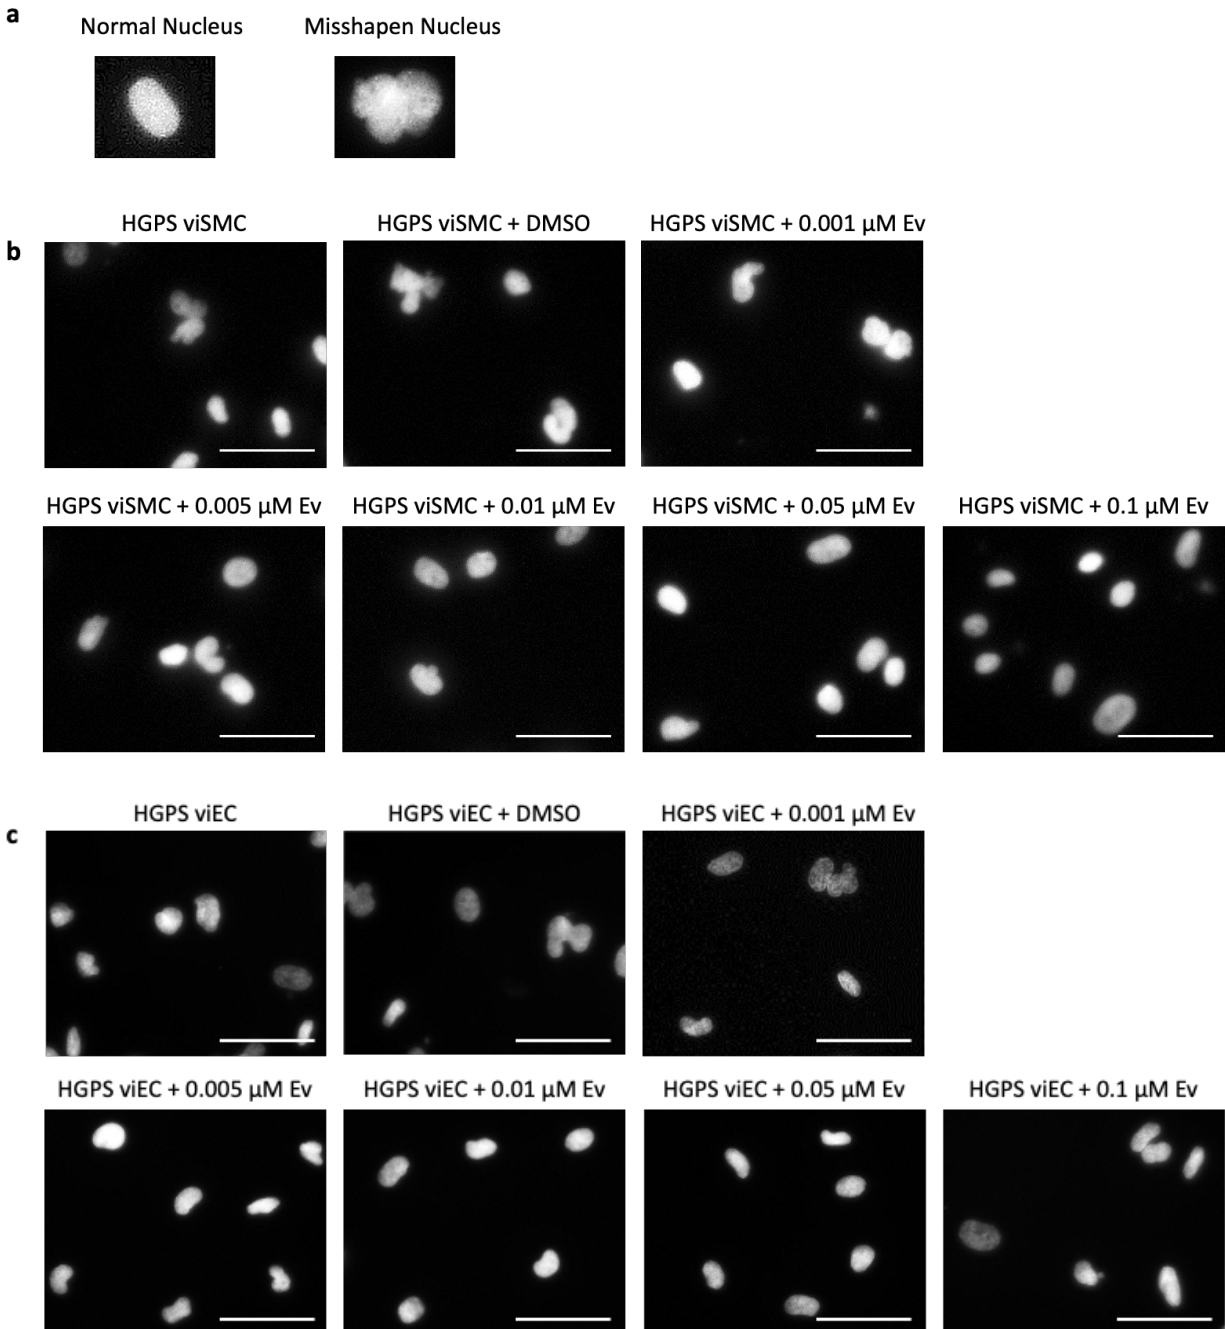

(a) Images of normal and misshapen Hoechst-stained HGPS nuclei. Images of Hoechst-stained HGPS viSMC (b) and viEC (c) nuclei after exposure to the indicated concentrations of Everolimus (Ev) for 7 days, scale bar = 50  $\mu$ m. Images were sharpened in ImageJ to enhance contrast.

**Figure S5. Everolimus reduces ROS levels, increases proliferation, and decreases DNA damage in HGPS 003 CL1D viSMCs and viECs.**

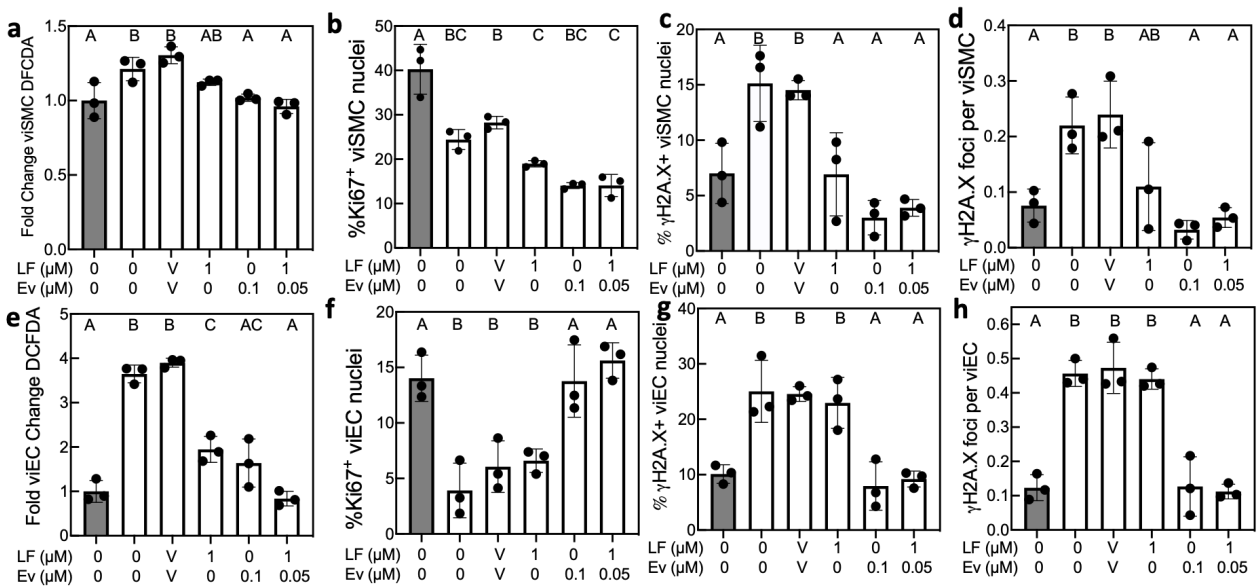

Healthy viSMCs (a-d) and viECs (e-h) and HGPS 003 CL1D viSMCs and viECs treated with different combinations of Lonafarnib (LF) and Everolimus (Ev) for: fold change of DCFDA mean fluorescence intensity compared with healthy in viSMCs (a) and viECs (e); percent positive Ki67 nuclei in viSMCs (b) and viECs (f); percent nuclei with  $\gamma$ H2A.X foci in viSMCs (c) and viECs (g); and number of  $\gamma$ H2A.X foci per total cells in viSMCs (d) and viECs (h). V' indicates DMSO vehicle control. Healthy bars are shown in gray and HGPS bars are shown in white. Data presented as mean  $\pm$  SD. N = 3 experiments per group. Data were analyzed by ANOVA followed by a post hoc Tukey test. Groups connected by the same letter are not significantly different from each other ( $p > 0.05$ ). Groups labeled with different letters are significantly different from each other ( $p < 0.05$ ). Exact p-values for significant differences are provided in Table S3.

**Figure S6. Representative images of HGPS viECs and viSMCs treated with DCFDA to detect reactive oxygen species**

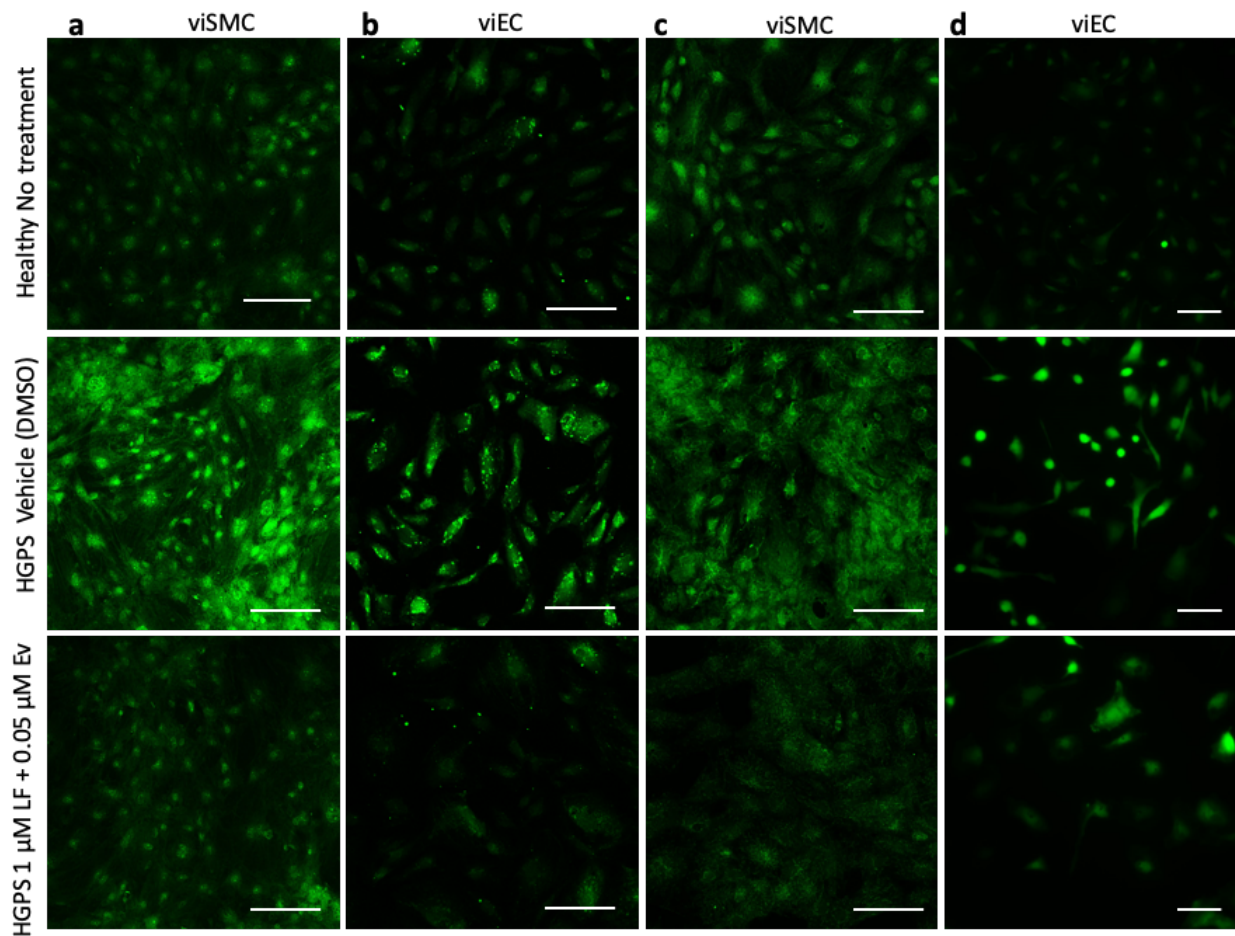

Representative DCFDA images for healthy, HGPS 167 (**a**, **b**), and HGPS 003 (**c**, **d**) viSMCs and viECs with and without LF+Ev treatment. Scale bar 100  $\mu$ m. Images shown in panels **a**, **b**, **c**, and **d** correspond to quantification shown in Figs. 2a, 2e, S5a, and S5e, respectively.

**Figure S7. Images of HGPS viEC and viSMC Proliferation as measured using Ki67**

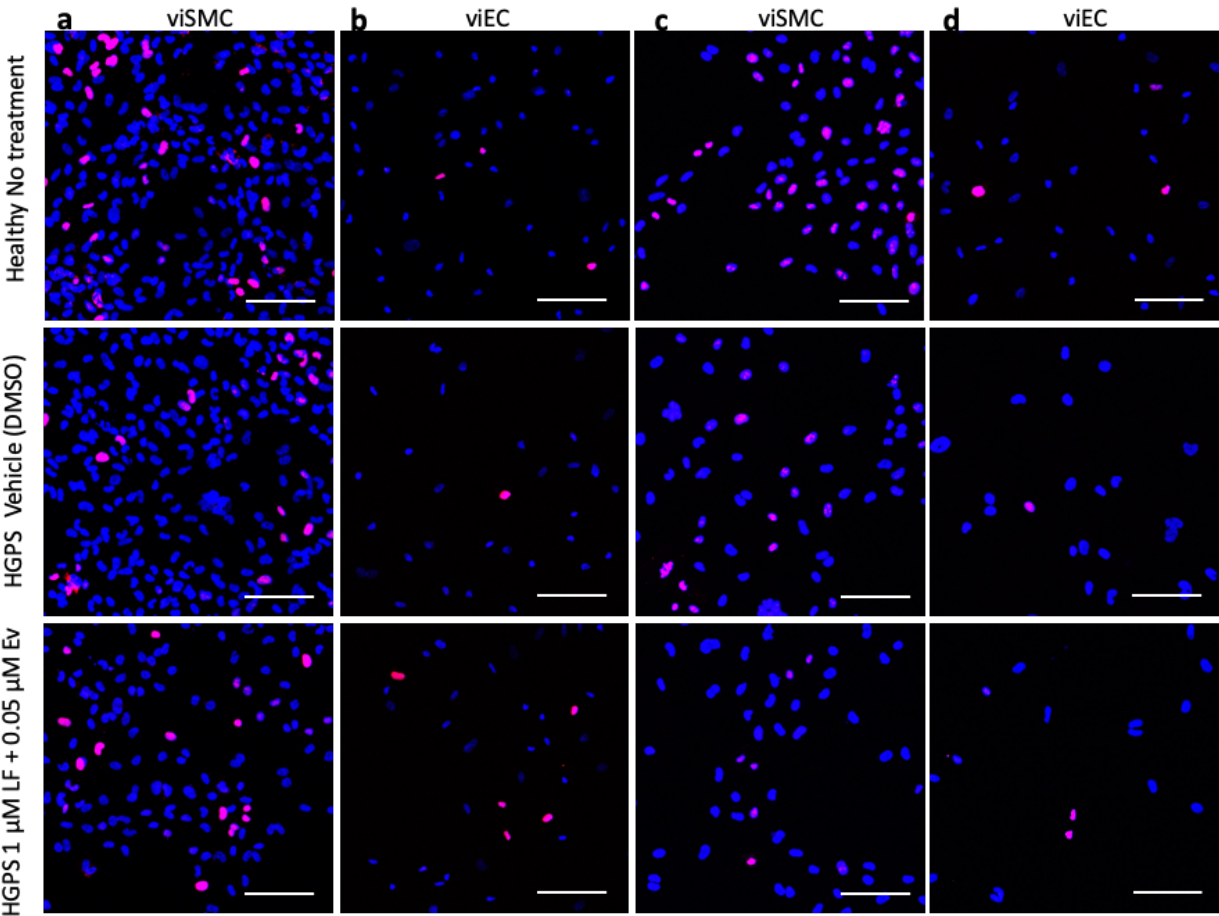

Representative Ki67 images for healthy, HGPS 167 (a, b), and HGPS 003 (c, d) viSMCs and viECs with and without LF+Ev treatment. Scale bar 100 μm. Images shown in panels a, b, c, and d correspond to quantification shown in Figs. 2b, 2f, S5b, and S5f, respectively. Red staining indicates nuclei staining positively for Ki67.

**Figure S8. Images of DNA double-stranded breaks in HGPS viEC and viSMC**

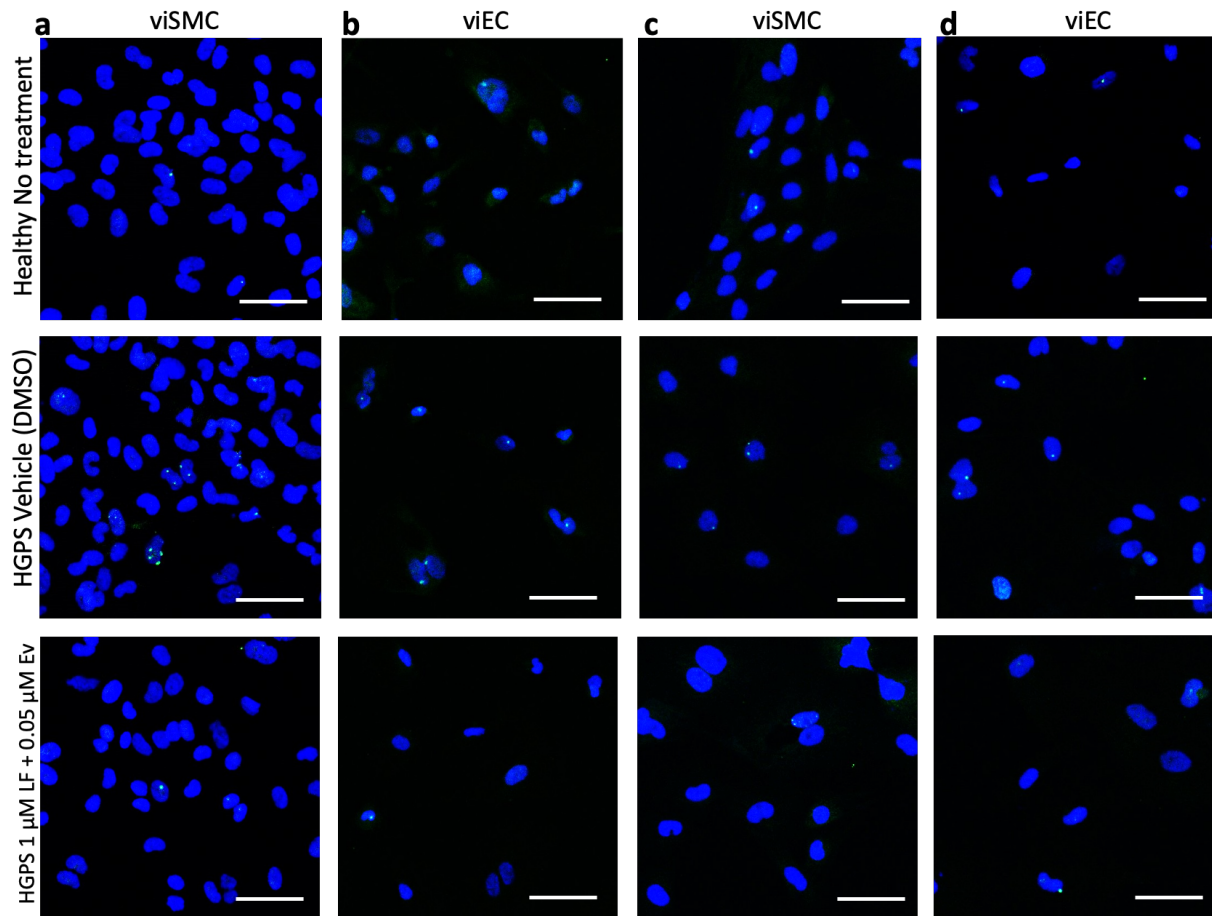

Representative  $\gamma$ H2A.X images for healthy, HGPS 167 (a, b), and HGPS 003 (c, d) viSMCs and viECs with and without LF+Ev treatment. Scale bar 50  $\mu$ m. Images shown in panel a correspond to quantification shown in Fig. 2c, d, panel b to quantification shown in Fig. 2g, h, panel c to quantification shown in Fig. S5c, d, and panel d to quantification shown in Fig. S5g, h. Green foci indicate positive staining for  $\gamma$ H2A.



**Figure S9. Images of DAF-FM staining in HGPS viECs after exposure to flow**

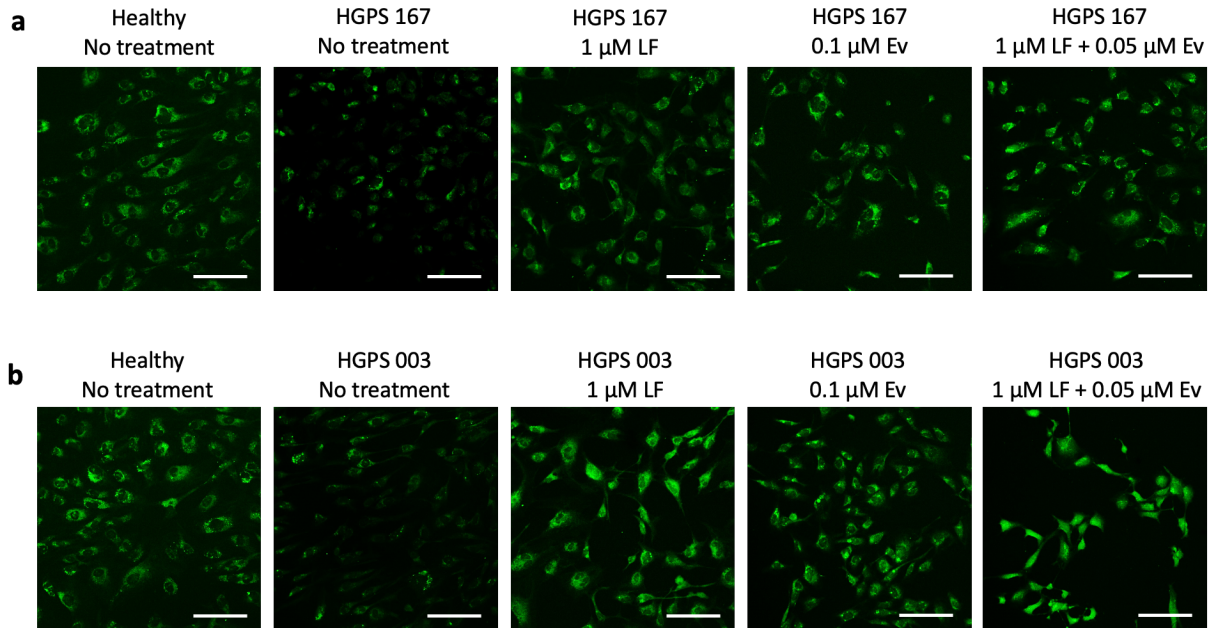

Representative images of DAF-FM diacetate in HGPS 167 (a) and HGPS 003 (b) viECs exposed to 12 dynes/cm<sup>2</sup> shear stress for 24 hours, with and without 7-day LF and Ev treatment. Scale bar 100 μm. Quantification is shown in Fig. 3a, b.

**Figure S10. 2-week treatment of HGPS 167 CL2 TEBVs with Lonafarnib and Everolimus.**

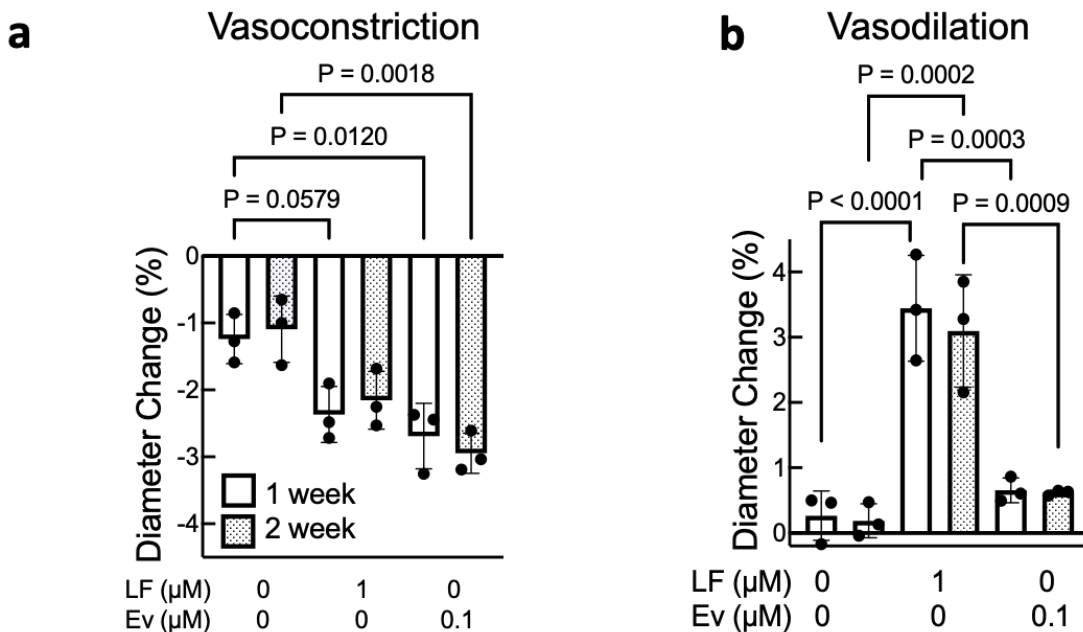

Diameter change in response to 5-minute exposure to (a) 1 μM phenylephrine or (b) 1 μM acetylcholine of HGPS 167 CL2 TEBVs matured for 3 weeks then treated for 1 or 2 weeks with 1 μM Lonafarnib or 0.1 μM Everolimus. Data presented as mean ± SD. N = 3 TEBVs per treatment. Data analyzed by ANOVA followed by post hoc Tukey test.

**Fig. S11. TEBV contractile and endothelial protein expression with Lonafarnib, Everolimus, and toxic combination treatment.**

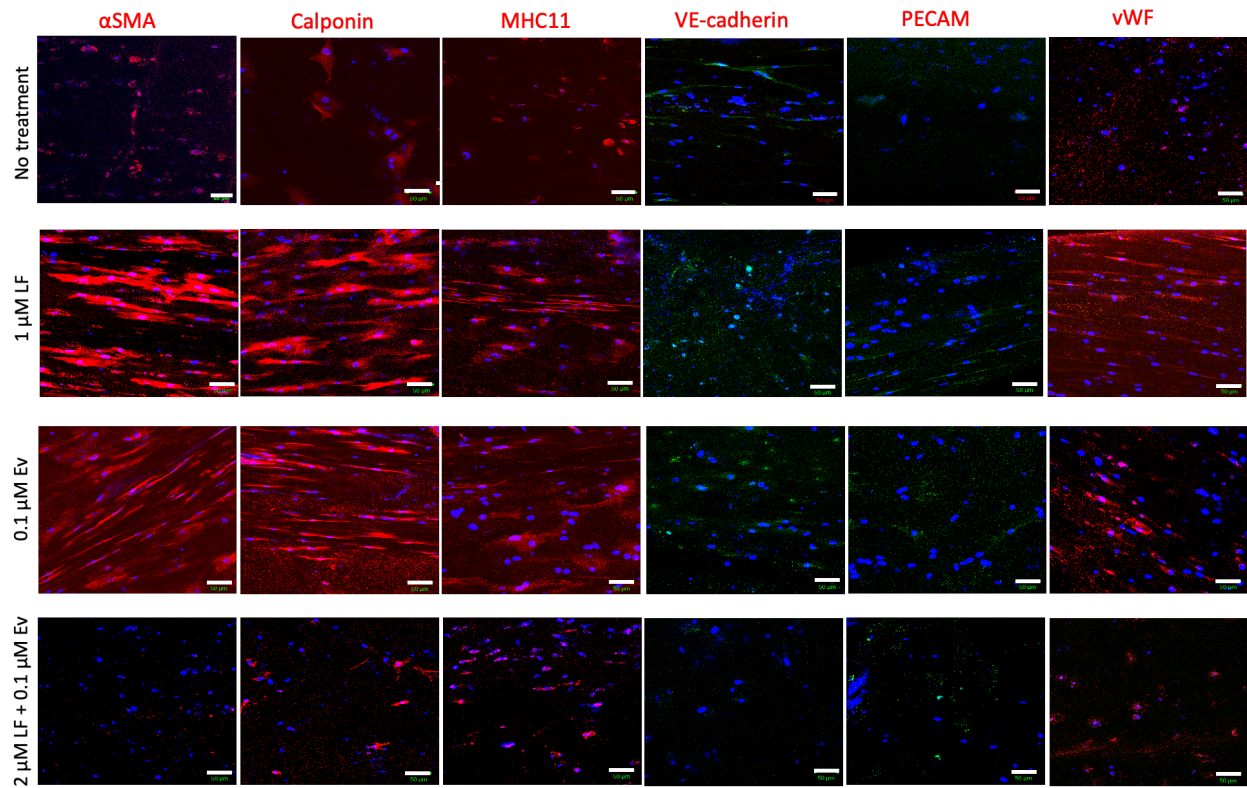

Representative images of SMC markers  $\alpha$ -smooth muscle actin ( $\alpha$ SMA), calponin, and myosin heavy chain 11 (MHC11) and endothelial markers vascular endothelial cadherin (VE-cadherin), platelet endothelial cell adhesion molecule (PECAM), and von Willebrand factor (vWF) expression in TEBVs matured for 3 weeks then treated with Lonafarnib (LF), Everolimus (Ev), or both for 1 week. Scale bar 50  $\mu$ m. Representative images for HGPS TEBVs with no treatment shown in Figure 5 are provided again for comparison.

**Figure S12. HGPS TEBV Progerin, Fibronectin, Collagen IV and VCAM-1 with Lonafarnib, Everolimus, and toxic combination treatment.**

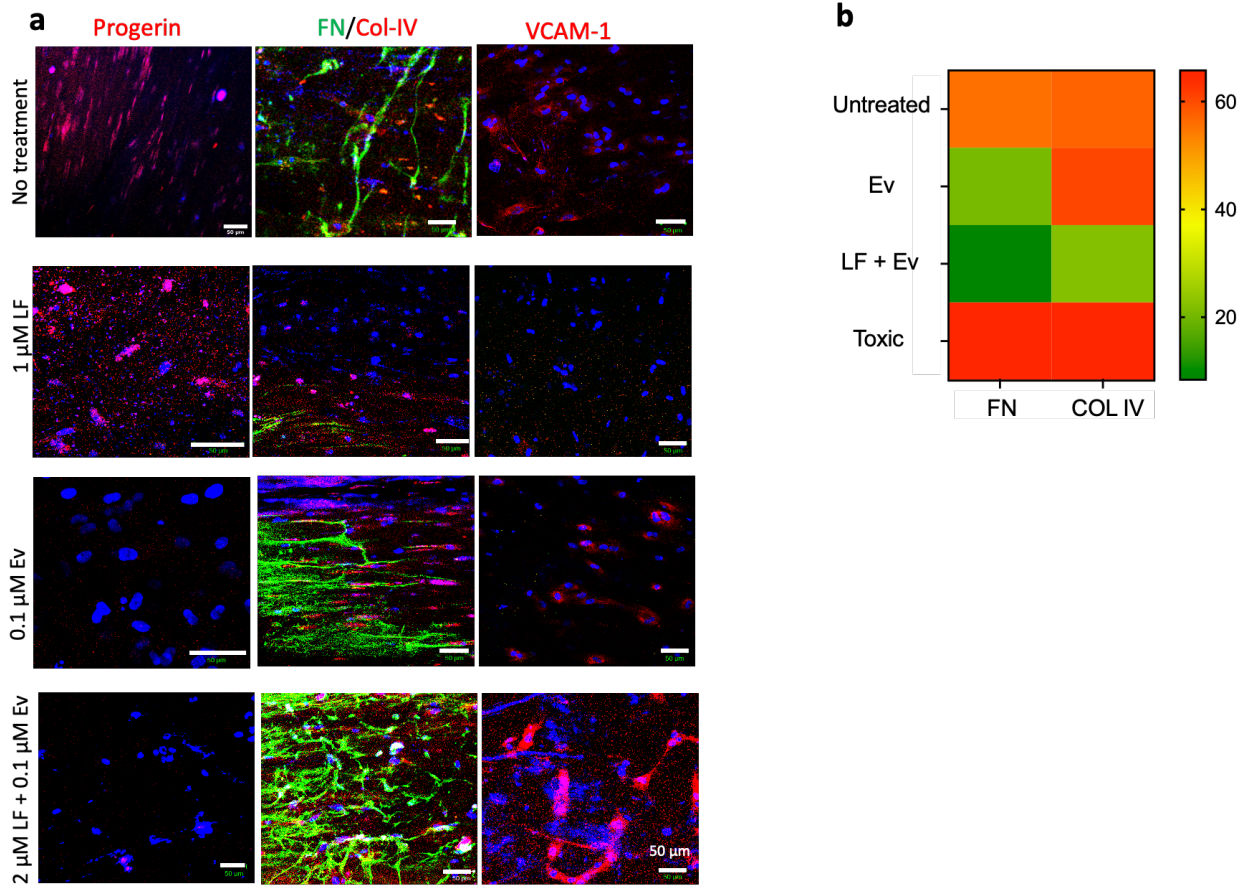

**a.** Representative images of progerin, fibronectin (FN), collagen IV (Col-IV), and vascular cell adhesion molecule-1 (VCAM-1) expression in TEBVs matured for 3 weeks then treated with LF, Ev, or both for 1 week. Scale bar 50 μm for progerin, FN/Col-IV, and VCAM-1. Representative images for HGPS TEBVs with no treatment shown in Figure 6 are provided again for comparison. **b.** Heatmap showing relative change in FN and COL IV after treatments from staining in a single experiment for each condition.



**Figure S13. HGPS TEBV disease pathology with Lonafarnib, Everolimus, and toxic combination treatment.**

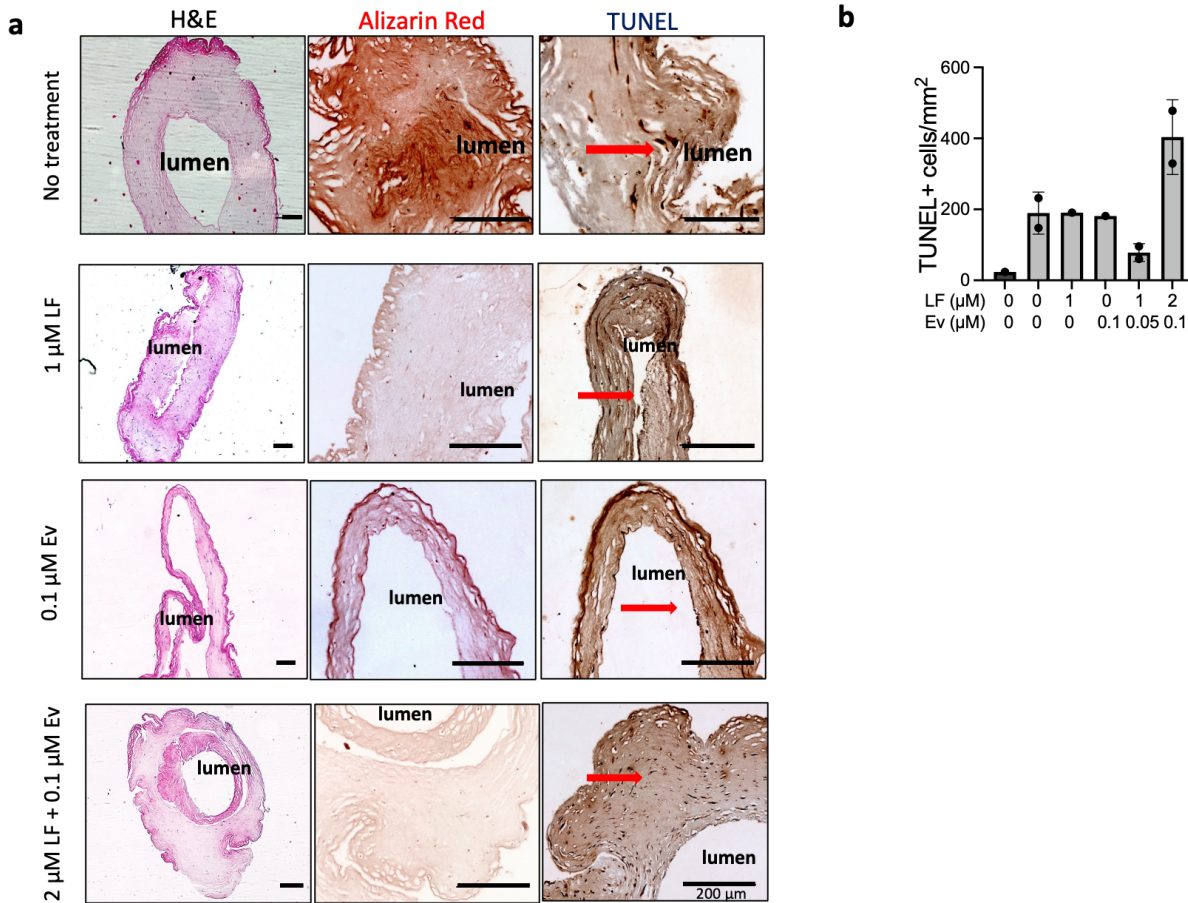

**a.** Representative images of H&E staining, Alizarin Red staining, and TUNEL staining in TEBVs matured for 3 weeks then treated with LF, Ev, or both for 1 week. Scale bar 200  $\mu$ m for H&E, Alizarin Red, and TUNEL. Representative images for HGPS TEBVs with no treatment shown in Figure 6 are provided again for comparison. **b.** Trends in TUNEL positive cells treatments. Dark gray bar indicates healthy TEBVs.

**Figure S14. Effects of Everolimus on autophagy in HGPS TEBVs**

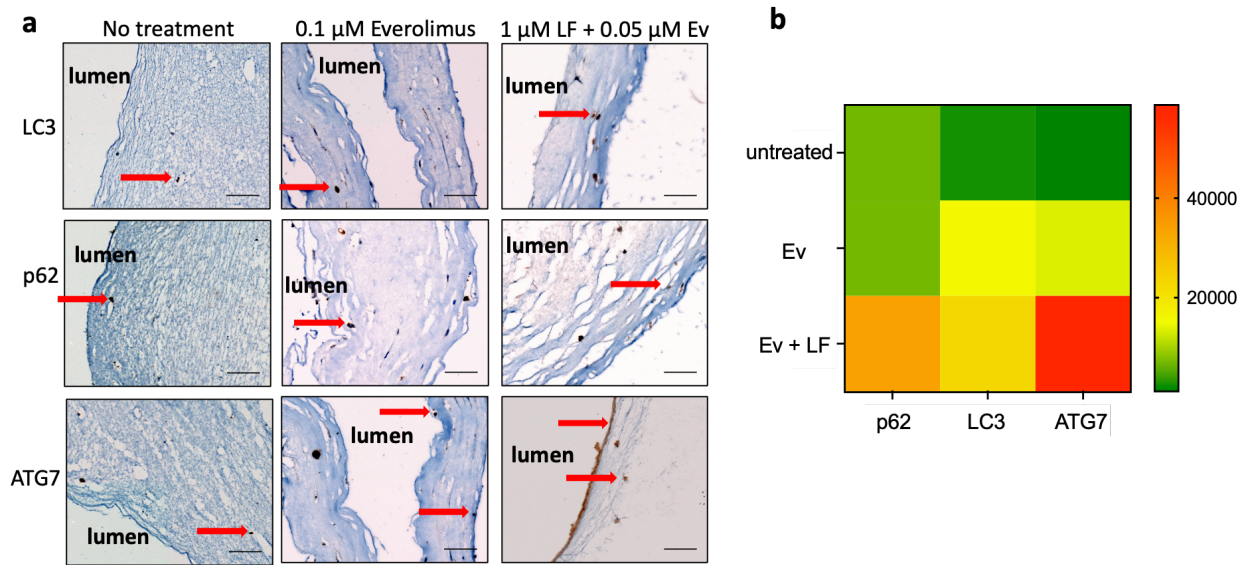

**a.** Representative images of immunohistological staining in HGPS TEBVs for autophagy proteins LC3-I/LC3-II, p62 and ATG7 after 3 weeks of normal perfusion and 1 week of either no treatment, 0.1  $\mu$ M Everolimus, or 0.05  $\mu$ M Everolimus and 1  $\mu$ M Lonafarnib treatment (scale bar, 50  $\mu$ m). Red arrows indicate LC3, p62 and ATG7-positive cells. **b.** Heatmap showing relative change in autophagy markers after various treatments from a single experiment for each condition.



**Table S1. Significant p-values from experiments in Figure 2.**

| Comparison |            | Figure Panel |        |         |        |         |        |        |        |
|------------|------------|--------------|--------|---------|--------|---------|--------|--------|--------|
|            |            | 2A           | 2B     | 2C      | 2D     | 2E      | 2F     | 2G     | 2H     |
| Healthy    | HGPS NT    | 0.0022       | 0.0018 | <0.0001 | 0.0014 | <0.0001 | 0.0117 | 0.0019 | 0.0023 |
| Healthy    | HGPS DMSO  | 0.0019       | 0.0038 | <0.0001 | 0.0061 | <0.0001 | 0.0198 | 0.0059 | 0.0096 |
| Healthy    | HGPS LF    | NS           | 0.0093 | 0.0084  | 0.0199 | 0.0001  | NS     | 0.0045 | 0.0156 |
| Healthy    | HGPS Ev    | NS           | NS     | NS      | NS     | NS      | NS     | NS     | NS     |
| Healthy    | HGPS LF+Ev | NS           | NS     | NS      | NS     | NS      | NS     | NS     | NS     |
| HGPS NT    | HGPS DMSO  | NS           | NS     | NS      | NS     | NS      | NS     | NS     | NS     |
| HGPS NT    | HGPS LF    | NS           | NS     | NS      | NS     | NS      | 0.0355 | NS     | NS     |
| HGPS NT    | HGPS Ev    | 0.0187       | 0.0094 | 0.0023  | NS     | <0.0001 | 0.0003 | 0.0014 | 0.0020 |
| HGPS NT    | HGPS LF+Ev | 0.0260       | 0.0043 | 0.0024  | NS     | <0.0001 | 0.0047 | 0.0072 | 0.0064 |
| HGPS DMSO  | HGPS LF    | NS           | NS     | NS      | NS     | NS      | NS     | NS     | NS     |
| HGPS DMSO  | HGPS Ev    | 0.0158       | 0.0207 | 0.0035  | NS     | <0.0001 | 0.0005 | 0.0042 | 0.0084 |
| HGPS DMSO  | HGPS LF+Ev | 0.022        | 0.0092 | 0.0037  | NS     | <0.0001 | 0.0079 | 0.0228 | 0.0285 |
| HGPS LF    | HGPS Ev    | NS           | NS     | NS      | NS     | <0.0001 | NS     | 0.0032 | 0.0136 |
| HGPS LF    | HGPS LF+Ev | NS           | 0.0228 | NS      | NS     | <0.0001 | NS     | 0.0173 | 0.0463 |
| HGPS Ev    | HGPS LF+Ev | NS           | NS     | NS      | NS     | NS      | NS     | NS     | NS     |

**Table S2. Significant p-values from experiments in Figure 3.**

| Comparison |            | Figure Panel |        |         |        |         |         |         |         |
|------------|------------|--------------|--------|---------|--------|---------|---------|---------|---------|
|            |            | 3A           | 3B     | 3D      | 3E     | 3F      | 3G      | 3H      | 3I      |
| Healthy    | HGPS NT    | 0.0015       | 0.0022 | 0.0513  | 0.0013 | <0.0001 | <0.0001 | 0.0001  | 0.0004  |
| Healthy    | HGPS DMSO  | N/A          | N/A    | N/A     | N/A    | N/A     | N/A     | N/A     | N/A     |
| Healthy    | HGPS LF    | NS           | NS     | <0.0001 | NS     | <0.0001 | NS      | 0.0230  | 0.0245  |
| Healthy    | HGPS Ev    | NS           | NS     | <0.0001 | 0.0007 | <0.0001 | 0.0177  | 0.0220  | 0.0016  |
| Healthy    | HGPS LF+Ev | NS           | NS     | <0.0001 | 0.0067 | <0.0001 | 0.0033  | 0.0462  | 0.0126  |
| HGPS NT    | HGPS DMSO  | N/A          | N/A    | N/A     | N/A    | N/A     | N/A     | N/A     | N/A     |
| HGPS NT    | HGPS LF    | 0.0015       | 0.0017 | <0.0001 | 0.0132 | <0.0001 | <0.0001 | <0.0001 | <0.0001 |
| HGPS NT    | HGPS Ev    | 0.0016       | 0.0002 | <0.0001 | NS     | <0.0001 | 0.0096  | 0.0189  | NS      |
| HGPS NT    | HGPS LF+Ev | 0.0074       | 0.0139 | <0.0001 | NS     | <0.0001 | NS      | <0.0001 | NS      |
| HGPS DMSO  | HGPS LF    | N/A          | N/A    | N/A     | N/A    | N/A     | N/A     | N/A     | N/A     |
| HGPS DMSO  | HGPS Ev    | N/A          | N/A    | N/A     | N/A    | N/A     | N/A     | N/A     | N/A     |
| HGPS DMSO  | HGPS LF+Ev | N/A          | N/A    | N/A     | N/A    | N/A     | N/A     | N/A     | N/A     |
| HGPS LF    | HGPS Ev    | NS           | NS     | <0.0001 | 0.0061 | <0.0001 | 0.0008  | 0.0001  | <0.0001 |
| HGPS LF    | HGPS LF+Ev | NS           | NS     | <0.0001 | NS     | 0.0267  | 0.0002  | NS      | <0.0001 |
| HGPS Ev    | HGPS LF+Ev | NS           | NS     | <0.0001 | NS     | 0.0003  | NS      | 0.0002  | NS      |

**Table S3. Significant p-values from experiments in Figure S5.**

| Comparison |            | Figure Panel |         |        |        |         |        |        |         |
|------------|------------|--------------|---------|--------|--------|---------|--------|--------|---------|
|            |            | S4A          | S4B     | S4C    | S4D    | S4E     | S4F    | S4G    | S4H     |
| Healthy    | HGPS NT    | 0.0215       | 0.0007  | 0.0169 | 0.0297 | <0.0001 | 0.0014 | 0.0030 | <0.0001 |
| Healthy    | HGPS DMSO  | 0.0014       | 0.0067  | 0.0280 | 0.0128 | <0.0001 | 0.0094 | 0.0038 | <0.0001 |
| Healthy    | HGPS LF    | NS           | <0.0001 | NS     | NS     | 0.0185  | 0.0155 | 0.0094 | 0.0001  |
| Healthy    | HGPS Ev    | NS           | 0.0002  | NS     | NS     | NS      | NS     | NS     | NS      |
| Healthy    | HGPS LF+Ev | NS           | <0.0001 | NS     | NS     | NS      | NS     | NS     | NS      |
| HGPS NT    | HGPS DMSO  | NS           | NS      | NS     | NS     | NS      | NS     | NS     | NS      |
| HGPS NT    | HGPS LF    | NS           | NS      | 0.0158 | NS     | 0.0001  | NS     | NS     | NS      |
| HGPS NT    | HGPS Ev    | 0.0387       | NS      | 0.0007 | 0.0047 | <0.0001 | 0.0018 | 0.0009 | <0.0001 |
| HGPS NT    | HGPS LF+Ev | 0.0065       | NS      | 0.0014 | 0.0119 | <0.0001 | 0.0004 | 0.0018 | <0.0001 |
| HGPS DMSO  | HGPS LF    | NS           | 0.0386  | 0.0261 | NS     | <0.0001 | NS     | NS     | NS      |
| HGPS DMSO  | HGPS Ev    | 0.0024       | NS      | 0.0011 | 0.0021 | <0.0001 | 0.0019 | 0.0012 | <0.0001 |
| HGPS DMSO  | HGPS LF+Ev | 0.0005       | 0.0182  | 0.0022 | 0.0052 | <0.0001 | 0.0022 | 0.0024 | <0.0001 |
| HGPS LF    | HGPS Ev    | NS           | NS      | NS     | NS     | NS      | 0.0195 | 0.0029 | 0.0001  |
| HGPS LF    | HGPS LF+Ev | NS           | NS      | NS     | NS     | 0.0059  | 0.0036 | 0.0057 | <0.0001 |
| HGPS Ev    | HGPS LF+Ev | NS           | NS      | NS     | NS     | NS      | NS     | NS     | NS      |

**Table S4. Comparison of Lonafarnib and Everolimus treatments alone and in combination.** “↑” indicates an increase and “↓” indicates a decrease by the treatment. Within the same row, additional arrows indicate a stronger effect between different treatments.

| Characteristic                         | Lonafarnib | Everolimus | Combination |
|----------------------------------------|------------|------------|-------------|
| <i>viECs and viSMCs</i>                |            |            |             |
| ROS Levels                             | ↓          | ↓↓         | ↓↓          |
| Proliferation                          | none       | ↑          | ↑           |
| DNA damage                             | none       | ↓          | ↓           |
| Shear stress-sensitive gene expression | ↑↑         | ↑          | ↑           |
| eNOS expression under shear stress     | none       | ↑          | ↑           |
| NO production under shear stress       | ↑          | ↑          | ↑           |
| <i>TEBVs</i>                           |            |            |             |
| Vasoconstriction                       | none       | ↑          | ↑           |
| Vasodilation                           | ↑          | none       | ↑           |
| SMC protein expression                 | ↑          | ↑          | ↑↑          |
| vWF expression                         | none       | none       | ↑           |
| Progerin expression                    | none       | ↓          | ↓           |
| ECM deposition                         | ↓          | none       | ↓           |
| Inflammation                           | ↓          | none       | ↓           |
| Calcification                          | ↓↓         | ↓          | ↓↓↓         |
| Cell Density                           | ↑          | none       | ↑           |
